# Supplementary material
Source: PubMed Central journal article supplement (PMC3593605)

## Supporting Information

### Structure-activity relationship study of the neuroprotective effects of Vitamin K derivatives

Benjamin J. Josey<sup>a</sup>, Elizabeth Inks<sup>a</sup>, Xuejun Wen,<sup>b</sup> and C. James Chou<sup>a\*</sup>

*a*, Department of Pharmaceutical and Biomedical Sciences, South Carolina College of Pharmacy, Medical University of South Carolina, Charleston, South Carolina 29425, USA

*b*, Department of Chemical and Life Science Engineering, Virginia Commonwealth University, Richmond, Virginia, 23284, USA

#### **Table of Contents**

|                                                                                                                                                                                    |   |
|------------------------------------------------------------------------------------------------------------------------------------------------------------------------------------|---|
| 1. Figure S1: Dose-response curves of Vitamin K <sub>1</sub> , Vitamin K <sub>2</sub> , and control compounds Necrostatin-1, Idebenone, Coenzyme Q <sub>10</sub> , and Trolox..... | 2 |
| 2. Figure S2: Scaffold optimization and cell viability assay results.....                                                                                                          | 2 |
| 3. Figure S3: Western blot of HO-1 and NQO-1.....                                                                                                                                  | 3 |
| 3. Figure S4: <i>t</i> -BuOOH protection results.....                                                                                                                              | 4 |
| 4. Synthetic schemes and <i>in vitro</i> protection and toxicity data for classes of derivatives not included in the text                                                          |   |
| TABLE S1 In Vitro Neuroprotective Activity of 2-amido-1,4-naphthoquinones.....                                                                                                     | 5 |
| TABLE S2. In Vitro Neuroprotective Activity of 2-ureyl-1,4-naphthoquinones.....                                                                                                    | 6 |
| TABLE S3: In Vitro Neuroprotective Activity of chromone derivatives.....                                                                                                           | 7 |
| 5. Table S4 and S5: Mouse blood chemistry and complete blood count results.....                                                                                                    | 8 |
| 6. Copies of HPLC, mass spectra, and <sup>1</sup> H NMR and HSQC spectral data for compounds <b>2q</b> and <b>2j</b> .....                                                         | 9 |

**FIGURE S1: Dose-response curves of Vitamin K<sub>1</sub>, Vitamin K<sub>2</sub>, and control compounds Necrostatin-1, Idebenone, Coenzyme Q<sub>10</sub>, and Trolox.** Cell viability assay was conducted as described in the Methods sections of the main text.

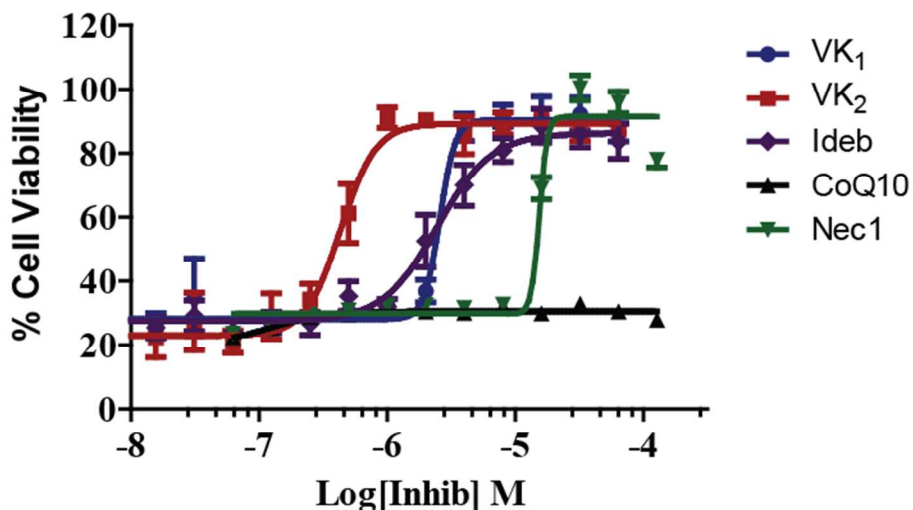

**Figure S2: Scaffold optimization and cell viability assay results.** Cell viability assay was conducted as described in the Methods sections of the main text.

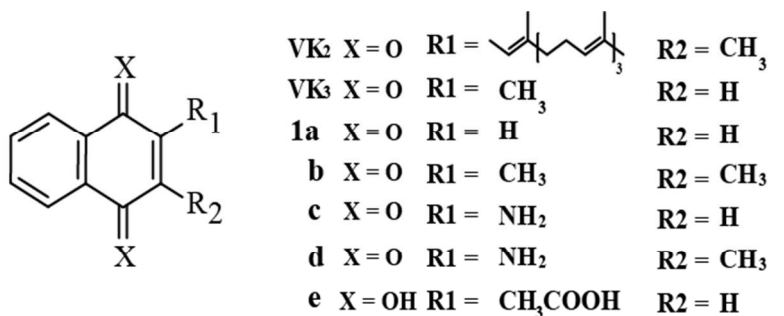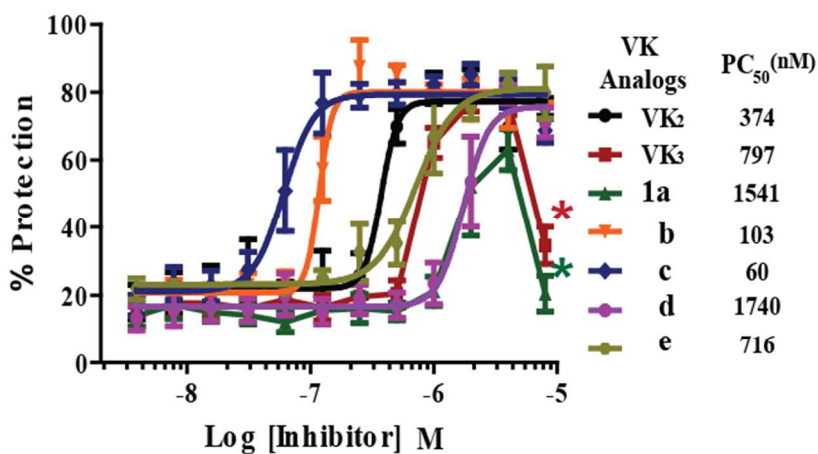

**Figure S3: Western blot of HO-1 and NQO-1.** HT22 cells were treated as described for 8 hrs and the cells were harvested and .

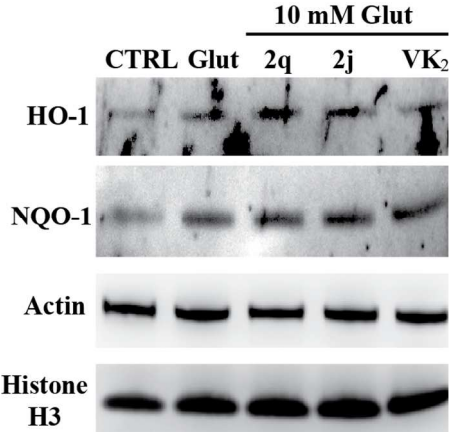

**Figure S4: t-BuOOH protection results.** Cell viability assay was conducted as described in the Methods sections of the main text.

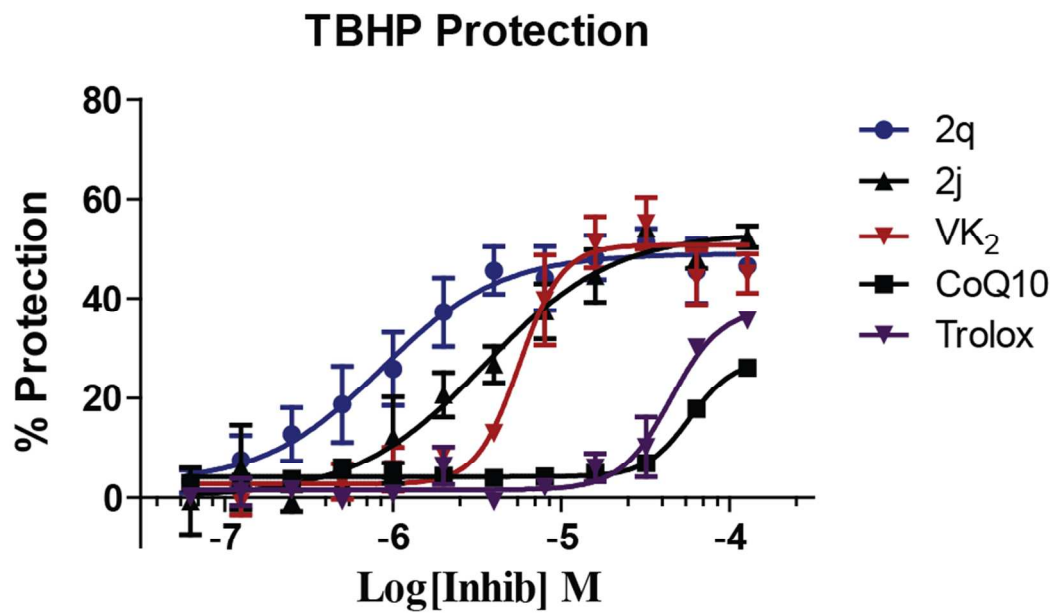

**TABLE S1.** In Vitro Neuroprotective Activity of 2-amido-1,4-naphthoquinones

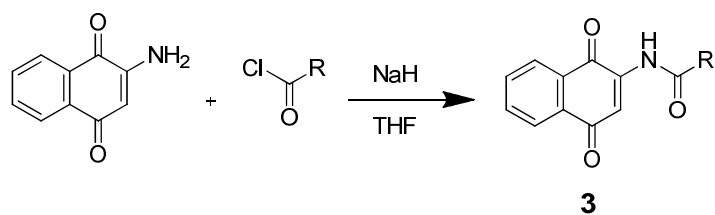

| Compound  | R   | Protection <sup>a</sup> | Toxicity <sup>b</sup> | Safety Index                        |
|-----------|-----|-------------------------|-----------------------|-------------------------------------|
|           |     | PC <sub>50</sub> (nM)   | TC <sub>50</sub> (nM) | TC <sub>50</sub> / PC <sub>50</sub> |
| <b>3a</b> | -Me | 616                     | >100,000              | 162                                 |
| <b>3b</b> | -Et | 760                     | 80,000                | 105                                 |
| <b>3c</b> |     | 69                      | 5,000                 | 72                                  |
| <b>3d</b> |     | >1000                   | 8,000                 | 0                                   |
| <b>3e</b> |     | >1000                   | 6,000                 | 0                                   |
| <b>3f</b> |     | 275                     | 14,000                | 51                                  |
| <b>3g</b> |     | 500                     | 17,000                | 34                                  |
| <b>3h</b> |     | 382                     | 24,000                | 63                                  |
| <b>3i</b> |     | 405                     | 27,000                | 67                                  |
| <b>3j</b> |     | 492                     | >100,000              | 203                                 |
| <b>3k</b> |     | 658                     | 32,000                | 49                                  |
| <b>3l</b> |     | 890                     | 42,000                | 47                                  |
| <b>3m</b> |     | 161                     | >100,000              | 621                                 |

In vitro neuroprotective activity and <sup>b</sup>neurotoxicity assessed by treating HT22 cells with various concentrations of compounds with or without 10 mM glutamate for 24 hrs. Cell viability was estimated by treating cells with MTS and measuring absorbance at 490 nM. PC<sub>50</sub>, concentration producing 50% protection, values calculated using GraphPad Prism based on 12 point titrations, n ≥ 4; TC<sub>50</sub>, concentration producing 50% toxicity, values calculated using GraphPad Prism based on 7 point titrations, n ≥ 3.

**TABLE S2.** In Vitro Neuroprotective Activity of 2-ureyl-1,4-naphthoquinones.

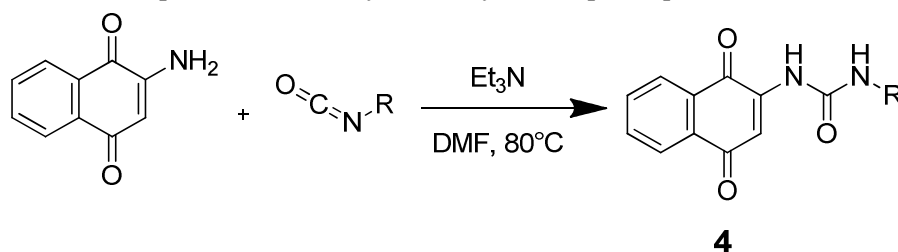

| Compound | R                                                                                 | Protection <sup>a</sup> | Toxicity <sup>b</sup> | Safety Index                       |
|----------|-----------------------------------------------------------------------------------|-------------------------|-----------------------|------------------------------------|
|          |                                                                                   | PC <sub>50</sub> (nM)   | TC <sub>50</sub> (nM) | TC <sub>50</sub> /PC <sub>50</sub> |
| 4a       | -Et                                                                               | 177                     | 5,000                 | 28                                 |
| 4b       |  | 64                      | 8,000                 | 125                                |
| 4c       |  | 890                     | >100,000              | 112                                |
| 4d       |  | 740                     | >100,000              | 135                                |

<sup>a</sup>In vitro neuroprotective activity and <sup>b</sup>neurotoxicity assessed by treating HT22 cells with various concentrations of compounds with or without 10 mM glutamate for 24 hrs. Cell viability was estimated by treating cells with MTS and measuring absorbance at 490 nM. PC<sub>50</sub>, concentration producing 50% protection, values calculated using GraphPad Prism based on 12 point titrations, n ≥ 4; TC<sub>50</sub>, concentration producing 50% toxicity, values calculated using GraphPad Prism based on 7 point titrations, n ≥ 3.

**TABLE S3.** In Vitro Neuroprotective Activity of chromone derivatives.

1. 0°C, SOCl<sub>2</sub>  
2. rt., aniline  
DMF

a) R<sub>1</sub>: H; R<sub>2</sub>: COOH  
b) R<sub>1</sub>: COOH; R<sub>2</sub>: H

a) R<sub>1</sub>: H; R<sub>2</sub>: CONHAr  
b) R<sub>1</sub>: CONHAr; R<sub>2</sub>: H

| Compound | Protection <sup>a</sup> | Toxicity <sup>b</sup> |
|----------|-------------------------|-----------------------|
|          | PC <sub>50</sub> (nM)   | TC <sub>50</sub> (nM) |
|          | >1000                   | >100,000              |
|          | >1000                   | >100,000              |
|          | >1000                   | >100,000              |
|          | >1000                   | >100,000              |

<sup>a</sup>In vitro neuroprotective activity and <sup>b</sup>neurotoxicity assessed by treating HT22 cells with various concentrations of compounds with or without 10 mM glutamate for 24 hrs. Cell viability was estimated by treating cells with MTS and measuring absorbance at 490 nM. PC<sub>50</sub>, concentration producing 50% protection, values calculated using GraphPad Prism based on 12 point titrations, n ≥ 4; TC<sub>50</sub>, concentration producing 50% toxicity, values calculated using GraphPad Prism based on 7 point titrations, n ≥ 3.

**TABLE S4.** Mouse Blood Chemistry Results.

| Parameter       | Units | Vehicle Control |      | Compound 2q (50 mg/kg; 3 wks i.p.) |      |      |
|-----------------|-------|-----------------|------|------------------------------------|------|------|
|                 |       | 1               | 2    | 1                                  | 2    | 3    |
| ALP             | U/L   | 90              | 79   | 72                                 | 80   | 60   |
| ALT             | U/L   | 35              | 32   | 34                                 | 28   | 33   |
| AST             | U/L   | 60              | 50   | 89                                 | 71   | 78   |
| Total Bilirubin | mg/dL | 0.20            | 0.20 | 0.20                               | 0.20 | 0.20 |
| Total Protein   | g/dL  | 4.9             | 5.0  | 5.2                                | 5.3  | 4.9  |
| Albumin         | mg/dL | 2.9             | 2.8  | 3.0                                | 3.2  | 2.8  |
| Creatinine      | mg/dL | 0.23            | 0.15 | 0.16                               | 0.23 | 0.18 |
| BUN             | mg/dL | 18              | 17   | 19                                 | 19   | 20   |
| Glucose         | mg/dL | 199             | 219  | 195                                | 205  | 195  |

**TABLE S5.** Mouse Complete Blood Count Results.

| Parameter           | Units | Vehicle Control |       | Compound 2q (50 mg/kg; 3 wks i.p.) |      |      |
|---------------------|-------|-----------------|-------|------------------------------------|------|------|
|                     |       | 1               | 2     | 1                                  | 2    | 3    |
| <b>Leukocytes</b>   |       |                 |       |                                    |      |      |
| WBC                 | K/uL  | 7.00            | 10.58 | 9.28                               | 8.82 | 6.62 |
| NE                  | K/uL  | 1.56            | 4.38  | 5.55                               | 3.03 | 3.78 |
| LY                  | K/uL  | 4.78            | 4.50  | 3.30                               | 5.14 | 2.45 |
| MO                  | K/uL  | 0.64            | 1.51  | 0.32                               | 0.43 | 0.35 |
| EO                  | K/uL  | 0.02            | 0.13  | 0.10                               | 0.17 | 0.01 |
| BA                  | K/uL  | 0.01            | 0.07  | 0.01                               | 0.05 | 0.02 |
| <b>Erythrocytes</b> |       |                 |       |                                    |      |      |
| RBC                 | M/uL  | 9.70            | 4.44  | 9.39                               | 9.46 | 9.37 |
| Hb                  | g/dL  | 14.8            | 16.0  | 13.9                               | 14.5 | 13.9 |
| HCT                 | %     | 54.6            | 24.6  | 51.1                               | 53.2 | 51.3 |
| MCV                 | fl    | 56.3            | 55.4  | 54.4                               | 56.2 | 54.8 |
| MCH                 | pg    | 15.3            | 36.0  | 14.8                               | 15.3 | 14.8 |
| MCHC                | g/dL  | 27.1            | 65.0  | 27.2                               | 27.3 | 27.1 |
| RDW                 | %     | 17.6            | 24.2  | 17.8                               | 17.7 | 17.4 |
| <b>Thrombocytes</b> |       |                 |       |                                    |      |      |
| PLT                 | K/uL  | 988             | 690   | 1139                               | 946  | 1050 |
| MPV                 | fl    | 4.6             | 4.8   | 4.5                                | 4.6  | 4.4  |



# Compound 2j H<sup>1</sup> NMR spectra

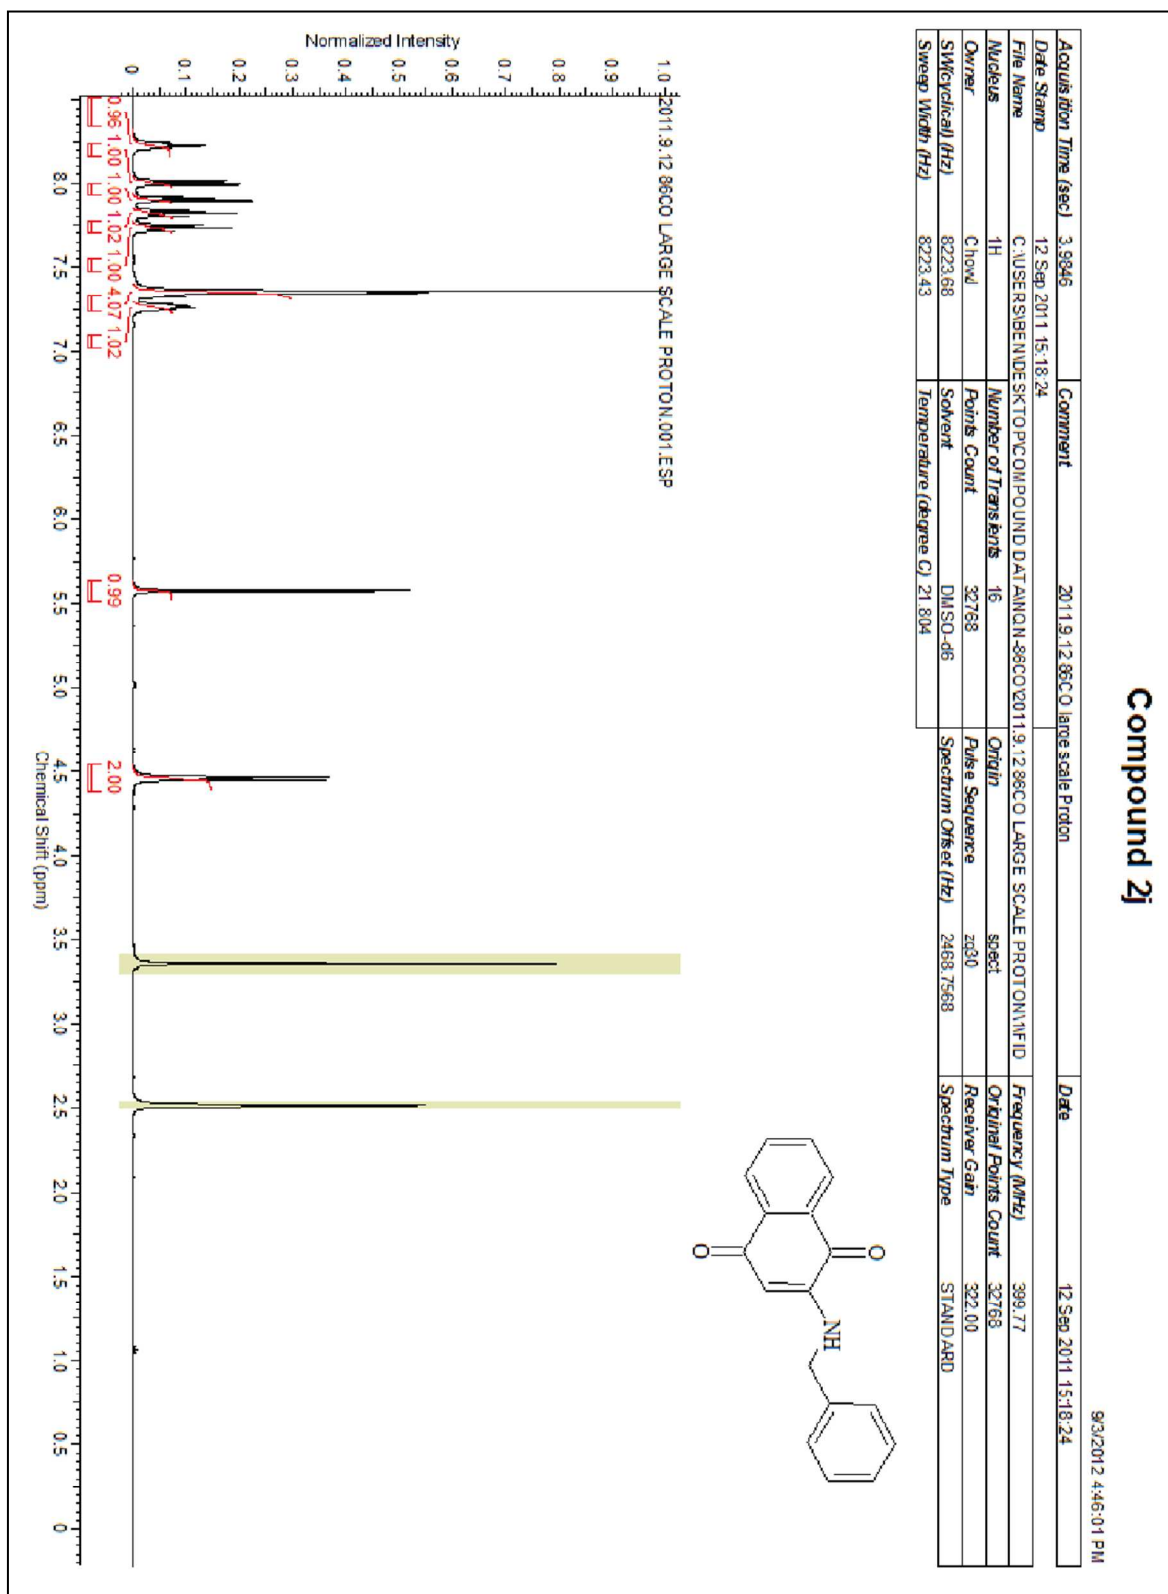

# Compound 2j Mass Spectra

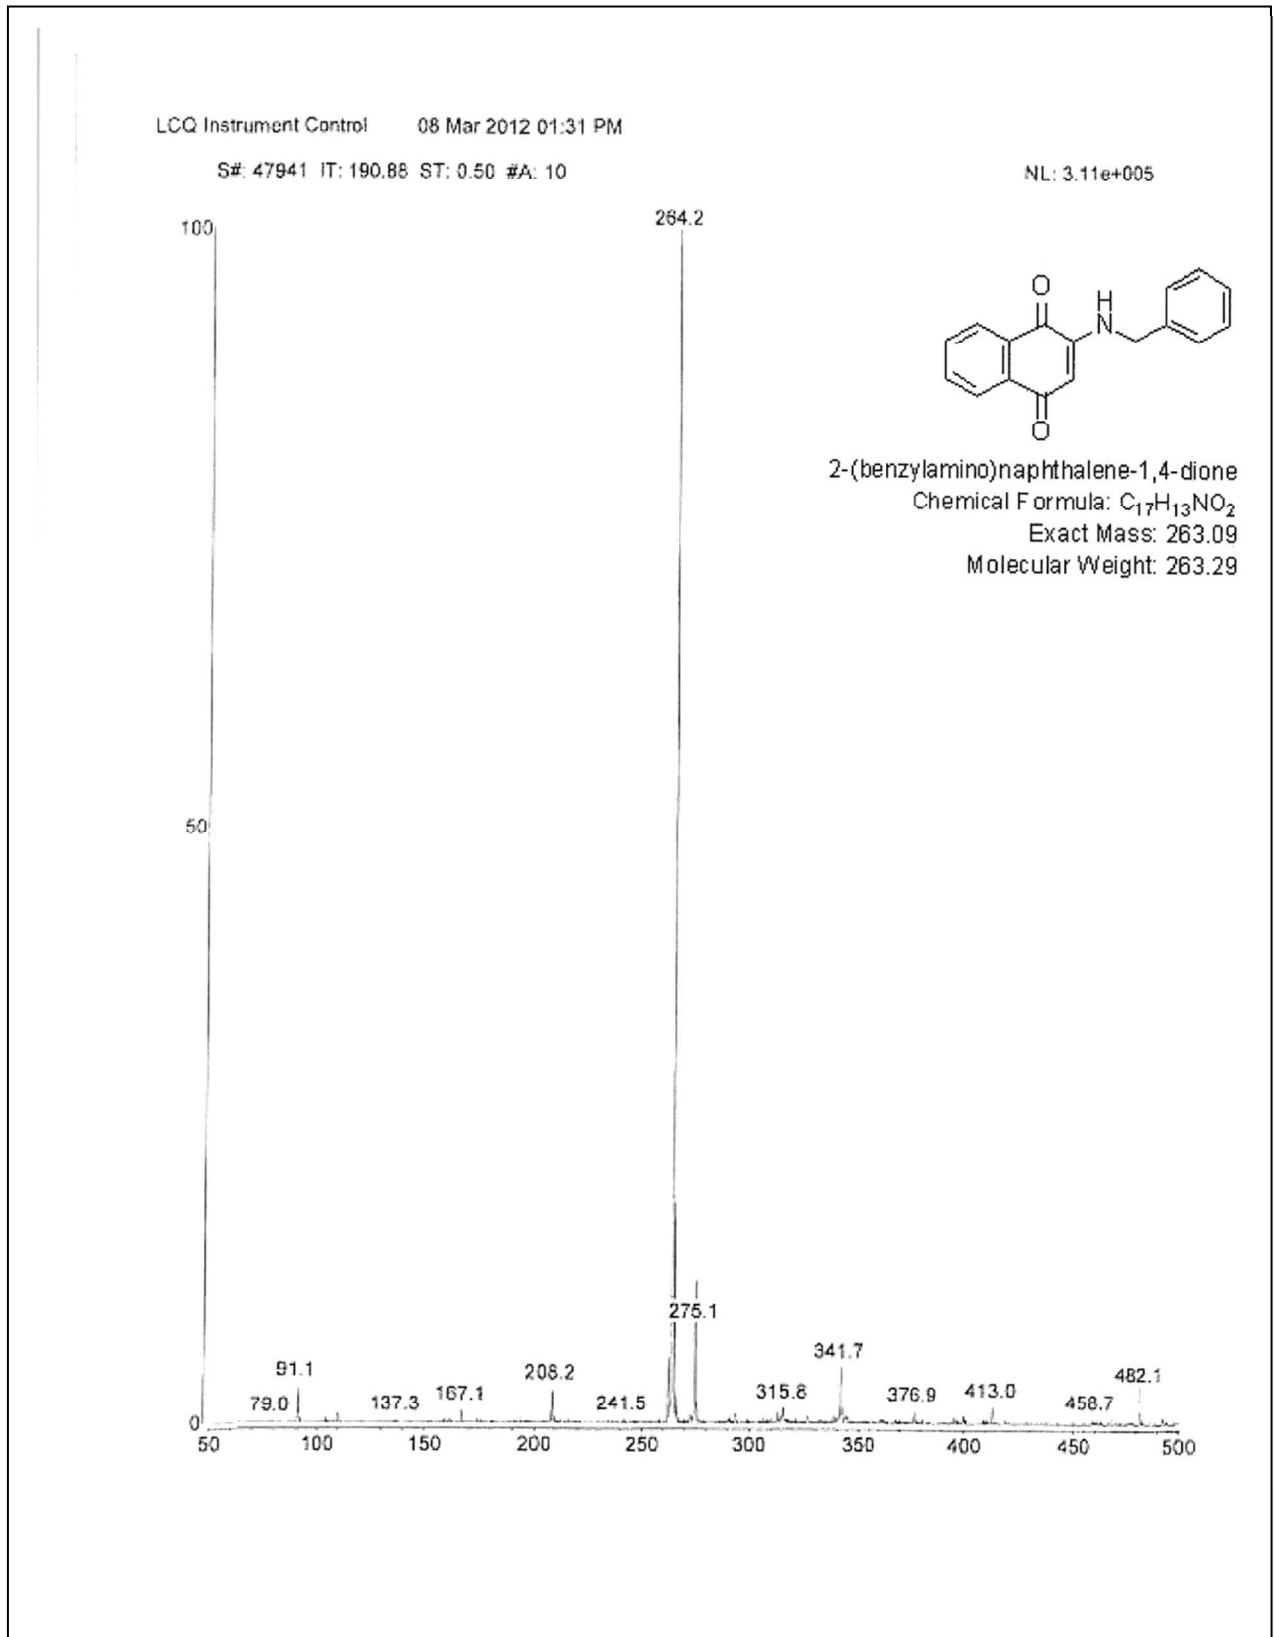

# Compound 2j Analytical HPLC

Purity: >97%

```
Data File C:\HPCHEM\1\DATA\BJJ\NQ00004.D                               Sample Name: nqn-3
=====
Injection Date   : 4/2/2012 8:03:52 PM                               Seq. Line   :    2
Sample Name     : nqn-3                                           Location    : Vial 41
Acq. Operator   : ben josey                                       Inj         :    1
Acq. Instrument : Agilent1100                                     Inj Volume  : 5 µl
Different Inj Volume from Sequence : Actual Inj Volume : 10 µl
Acq. Method     : C:\HPCHEM\1\METHODS\CCL52611.M
Last changed    : 4/2/2012 7:37:22 PM by ben josey
                  (modified after loading)
Analysis Method : C:\HPCHEM\1\METHODS\CCL52611.M
Last changed    : 2/15/2012 3:16:48 PM by Chris Lindsey
                  (modified after loading)
=====
```

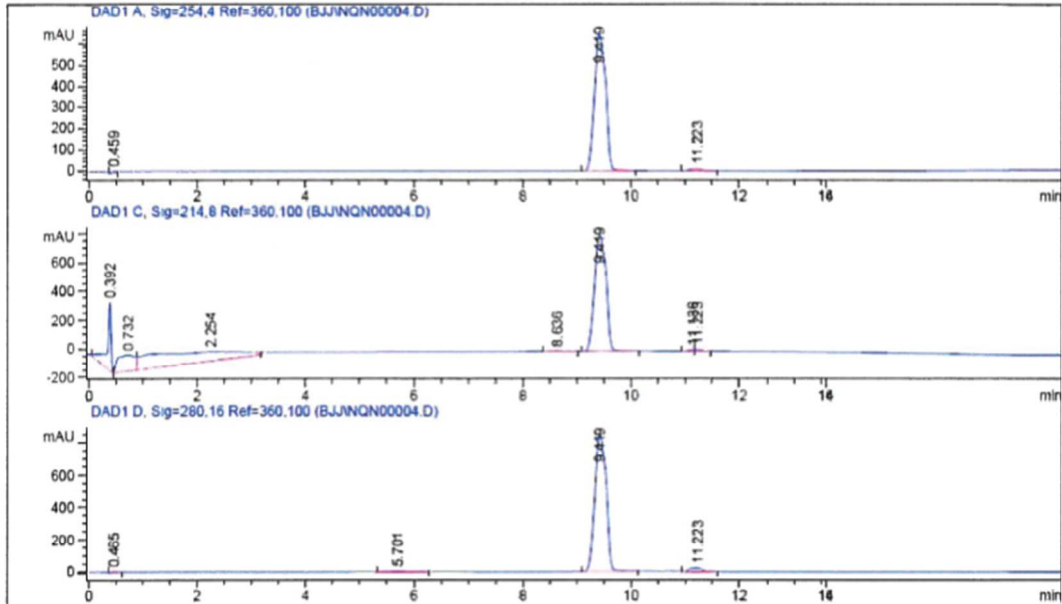

# Compound 2q H<sup>1</sup> NMR Spectra

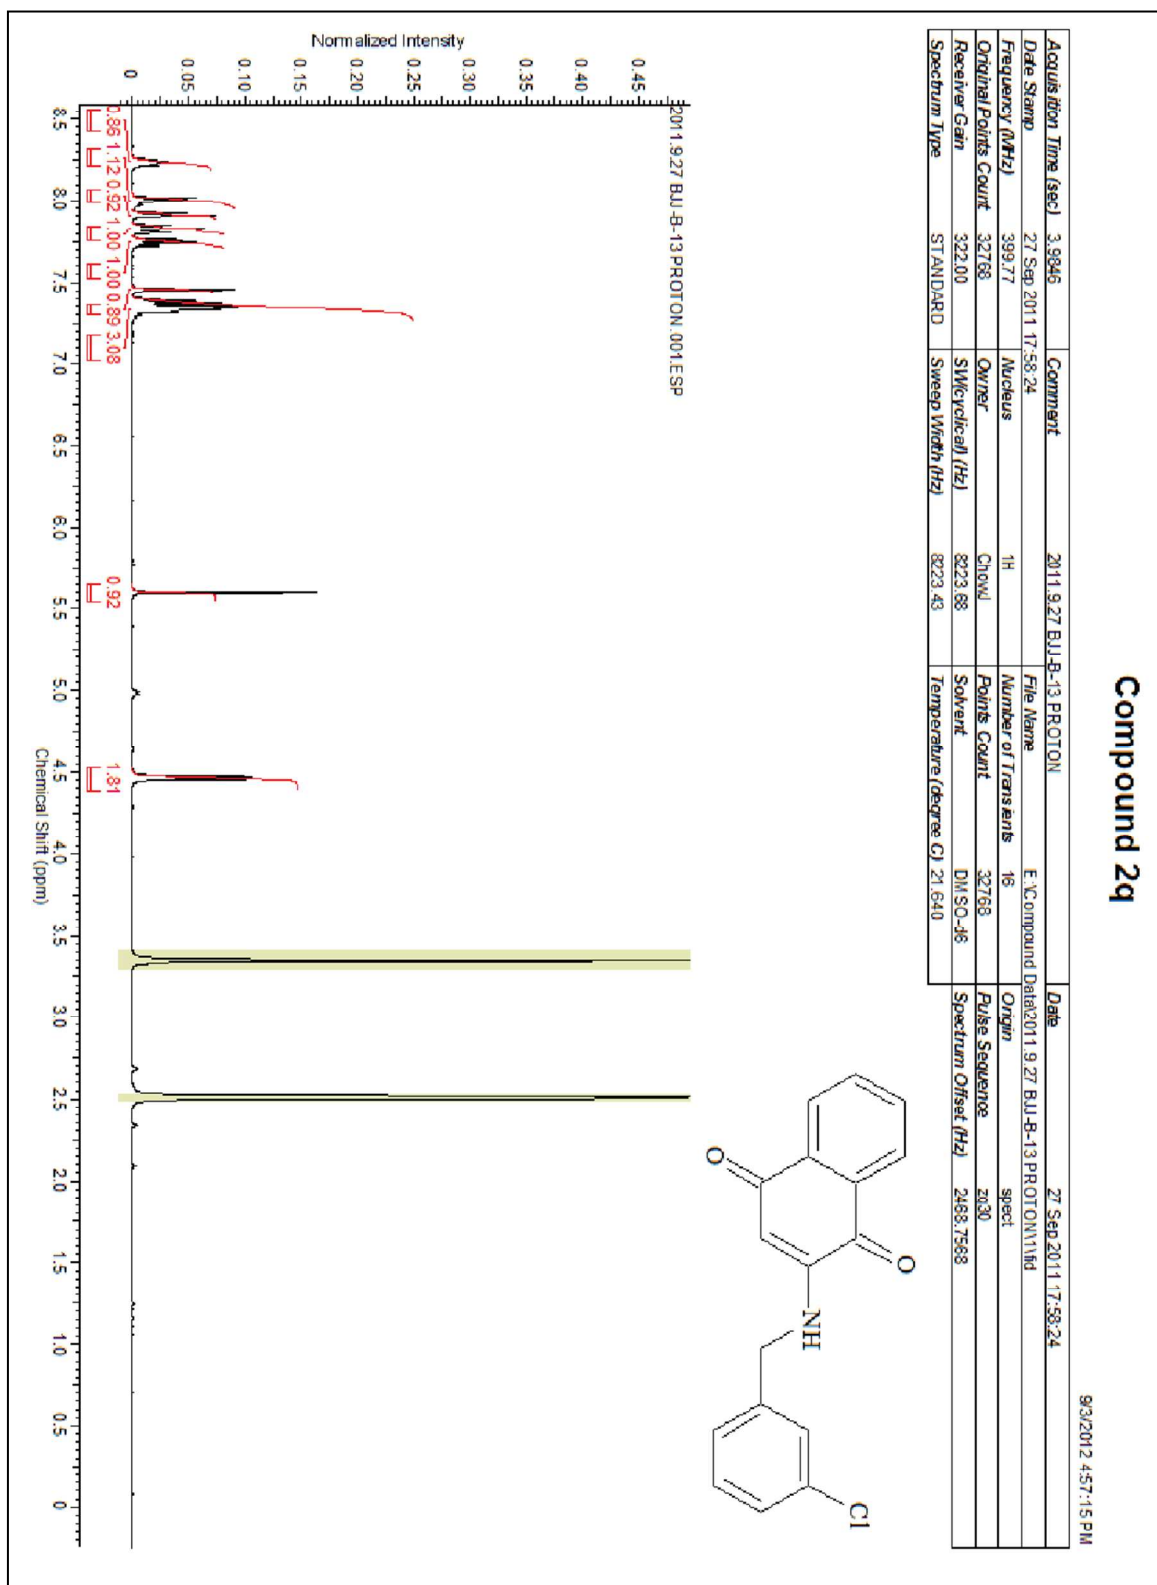

# Compound 2q Mass Spectra

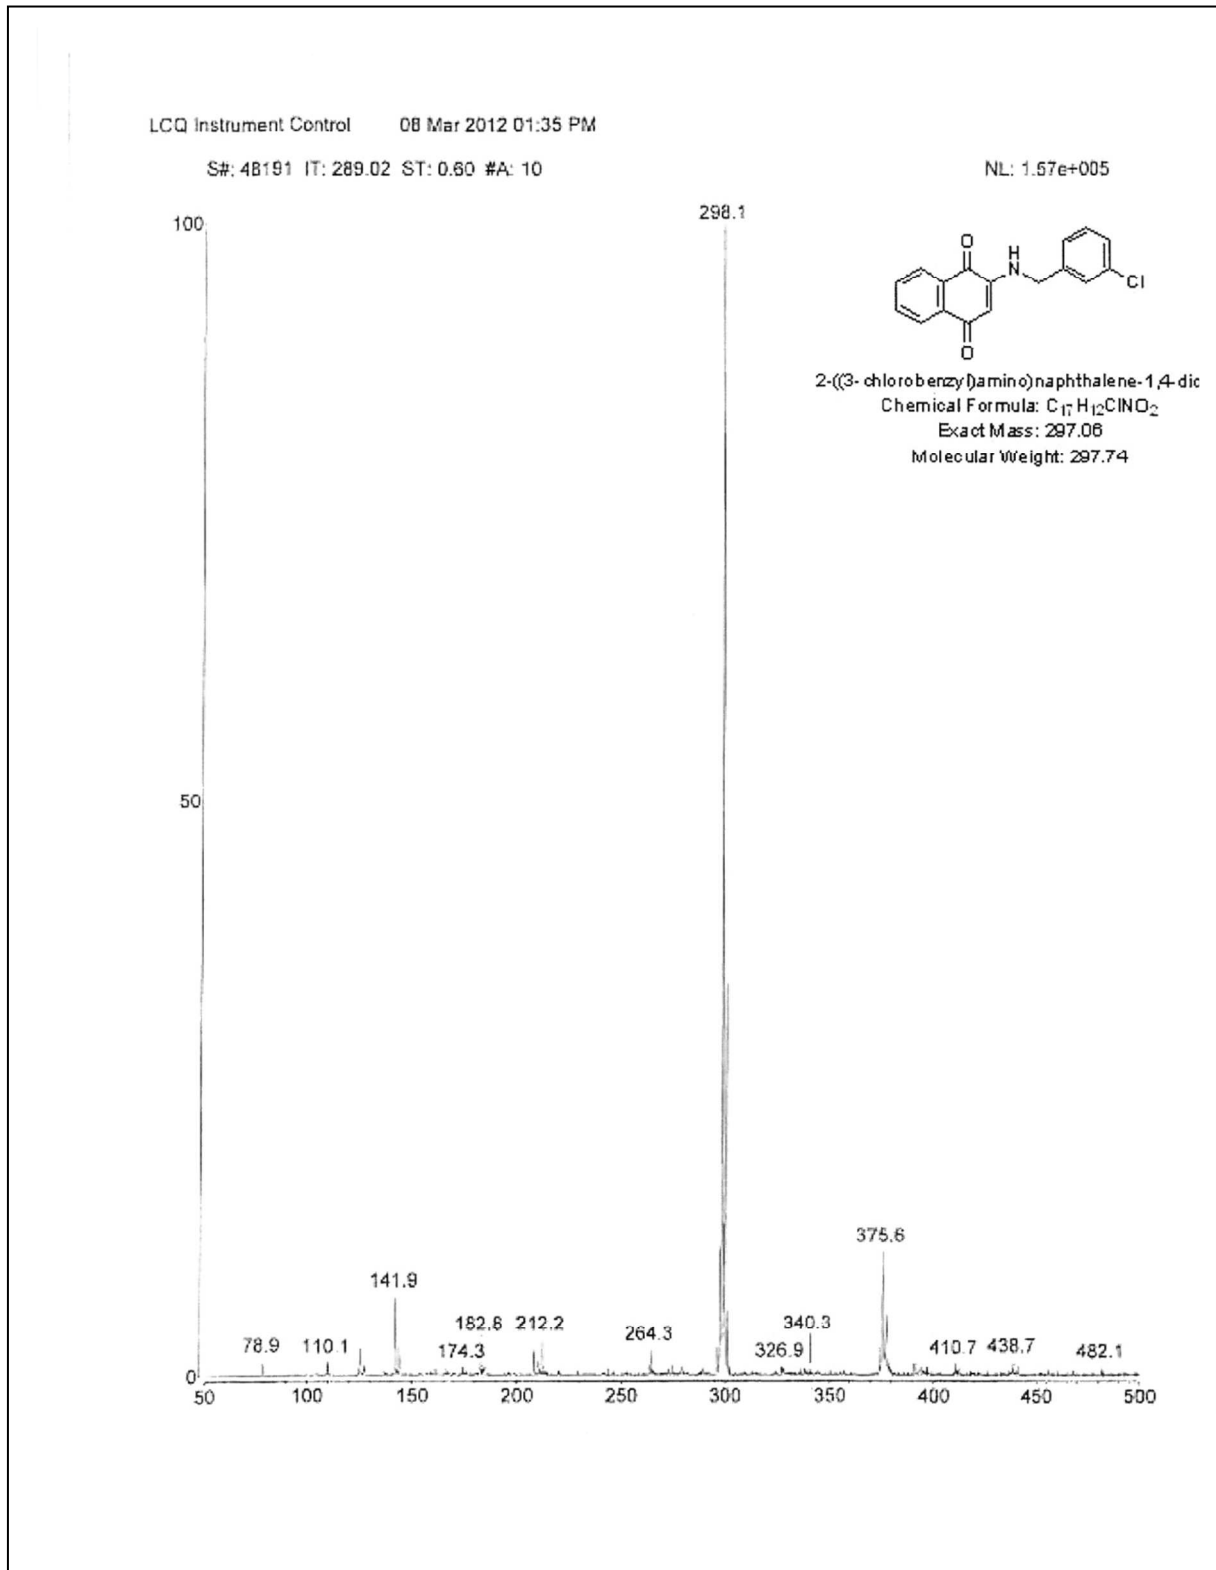

# Compound 2q Analytical HPLC

Purity: >95%

```
=====  
Data File C:\HPCHEM\1\DATA\BJJ\NQN00006.D                               Sample Name: nqn-5  
=====  
Injection Date : 4/2/2012 8:42:51 PM                               Seq. Line : 4  
Sample Name : nqn-5                                               Location : Vial 43  
Acq. Operator : ben josey                                         Inj : 1  
Acq. Instrument : Agilent1100                                     Inj Volume : 5 µl  
Different Inj Volume from Sequence !                               Actual Inj Volume : 10 µl  
Acq. Method : C:\HPCHEM\1\METHODS\CCL52611.M  
Last changed : 4/2/2012 7:37:22 PM by ben josey  
                (modified after loading)  
Analysis Method : C:\HPCHEM\1\METHODS\CCL52611.M  
Last changed : 2/15/2012 3:16:48 PM by Chris Lindsey  
                (modified after loading)  
=====
```

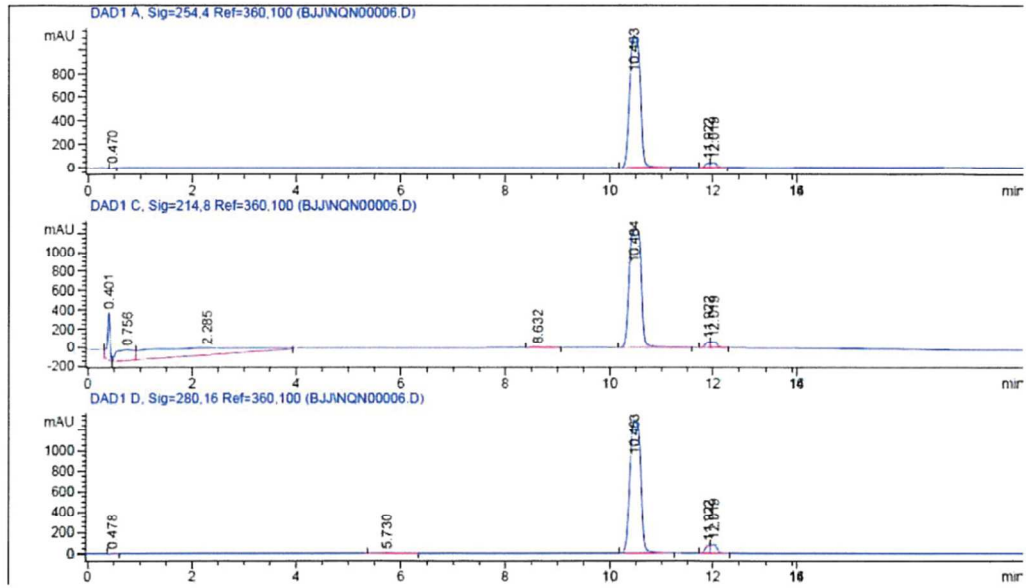

Supplement: NIHMS438563-supplement-1_si_001.pdf [file NIHMS438563-supplement-1_si_001.pdf]
